# Supplementary material
Source: PubMed Central journal article supplement (PMC7288902)

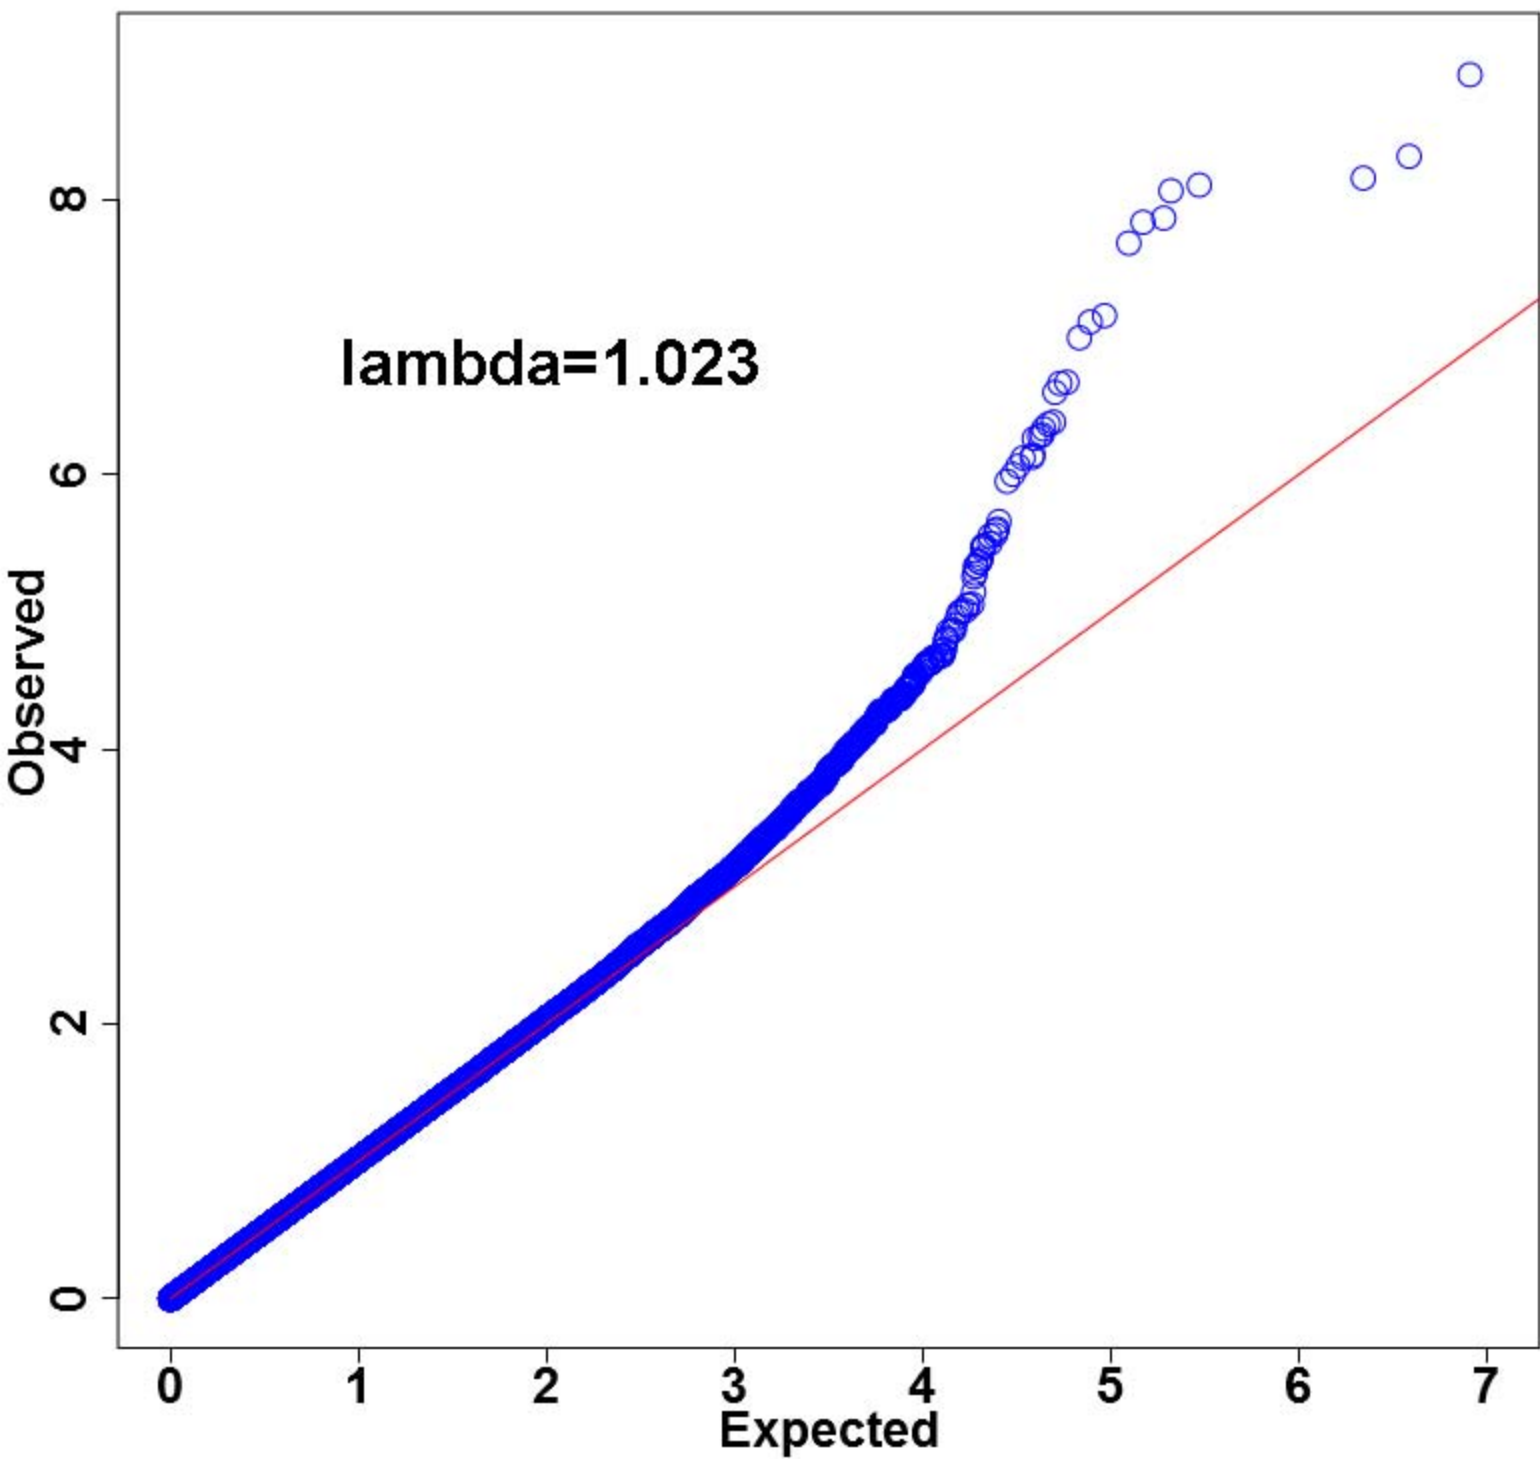

Supplement: NIHMS1045485-supplement-Supplementary_Figure_1.pdf [file NIHMS1045485-supplement-Supplementary_Figure_1.pdf]
